# Supplementary material for: Cannabidiol Modulates the Expression of Alzheimer’s Disease-Related Genes in Mesenchymal Stem Cells
Source: Int J Mol Sci. 2016 Dec 23;18(1):26. doi: 10.3390/ijms18010026 (PMC5297661; doi:10.3390/ijms18010026)
Supplement: Supplementary file 1 [file ijms-18-00026-s001.xlsx]

## Sheet: table S1
Table S1. Raw data of the expression levels obtained from CTR-GMSCs and CBD-GMSCs (each in triplicate). Data indicate the values of Fragments Per Kilobase Of Exon Per Million Fragments Mapped (FPKM).
test_id	locus	CTR1-HCMSCs_FPKM	CTR2-HCMSCs_FPKM	CTR3-HCMSCs_FPKM	CBD1-HCMSCs_FPKM	CBD2-HCMSCs_FPKM	CBD3-HCMSCs_FPKM
ACE1	chr17:61554421-61575741	8.08466	8.48442	10.0835	13.5711	13.9708	15.5699
ADAM9	chr8:38854504-38962779	324.852	324.801	324.597	366.736	366.685	366.481
AKT1	chr14:105235686-105262080	47.1288	47.1454	47.2115	59.4962	59.5128	59.5789
APH1A	chr1:150237798-150241609	18.0818	17.9361	17.3536	9.33937	9.19374	8.61122
BACE1	chr11:117103340-117186972	8.41201	8.03385	6.52124	6.50144	6.12328	4.61067
CAMK2A	chr5:149599053-149669403	0.269206	0.145727	0.348189	1e-05	1e-05	1e-05
CAMK2B	chr7:44256748-44365230	0.975229	0.475746	1.52219	1e-05	1e-05	1e-05
CAPN1	chr11:64948685-64979477	76.6457	76.4148	75.4913	56.8817	56.6508	55.7273
CAPN2	chr1:223889294-223963720	521.094	521.193	521.592	463.106	463.205	463.604
CDK5	chr7:150750898-150755052	12.6409	12.3973	11.4226	3.21545	2.97179	1.99715
CDK5R1	chr17:30814104-30818271	0.390188	0.032734	1.72442	1e-05	1e-05	1e-05
DYRK1A	chr21:38739858-38887679	6.6158	6.97828	8.4282	4.42987	4.79235	6.24227
ECE1	chr1:21543739-21672034	34.3404	34.5741	35.5088	49.1116	49.3453	50.28
GSK3B	chr3:119540801-119813264	5.37056	5.84277	7.73162	4.02985	4.50206	6.39091
HSP90AA1	chr14:102547074-102606086	424.384	424.11	423.014	724.657	724.383	723.287
HSP90AB1	chr6:44213902-44221625	573.365	573.136	572.219	705.046	704.817	703.9
HSP90B1	chr12:104324111-104341708	262.693	262.566	262.058	380.881	380.754	380.246
HSPA2	chr14:65007185-65009954	5.18186	4.99801	4.26264	11.2086	11.0247	10.2894
HSPA4	chr5:132387661-132440709	67.5755	67.7191	68.2935	98.2848	98.4284	99.0028
HSPA5	chr9:127997126-128003666	51.3278	51.7367	53.372	83.3926	83.8015	85.4368
HSPA8	chr11:122928199-122933043	593.481	593.383	592.991	674.361	674.263	673.871
IDE	chr10:94211440-94333852	9.39403	9.40634	9.45558	14.0224	14.0347	14.0839
MAPK1	chr22:22113946-22221970	35.1077	35.1482	35.3102	27.5091	27.5496	27.7116
MAPK12	chr22:50691330-50700188	8.0678	7.61871	5.82235	5.2578	4.80871	3.01235
MAPK14	chr6:35995453-36079013	15.0269	14.5463	12.6239	6.79299	6.31237	4.38992
MAPT	chr17_ctg5_hap1:762280-946818	0.0229652	0.180709	0.811685	1e-05	1e-05	1e-05
NCSTN	chr1:160258376-160328742	92.734	92.9828	93.9781	91.8416	92.0904	93.0857
PIK3CB	chr3:138371539-138478201	2.59012	2.96146	4.44681	4.85226	5.2236	6.70895
PSEN1	chr14:73603142-73690399	13.1378	13.5994	15.4458	7.62967	8.09129	9.93774
PSEN2	chr1:227058272-227083804	11.8083	11.8469	12.0016	4.37529	4.41395	4.56856
PSENEN	chr19:36236477-36238056	70.6272	70.1626	68.3042	52.3799	51.9153	50.0569
TMED10	chr14:75598170-75643349	39.4908	39.868	41.3767	44.7053	45.0825	46.5912
UBB	chr17:16284106-16286059	2457.56	2457.92	2459.33	3991.43	3991.79	3993.2
UBE2A	chrX:118708429-118718392	21.1183	21.4556	22.8049	31.6122	31.9495	33.2988
UBE2B	chr5:133706866-133727799	15.1907	15.5142	16.8079	31.8225	32.146	33.4397
UBE2D1	chr10:60094738-60130513	3.36602	3.03867	1.7293	7.37009	7.04274	5.73337
UBE2D2	chr5:138940750-139008018	10.9023	11.2278	12.5299	16.9863	17.3118	18.6139
UBE2D3	chr4:103698193-103790050	21.8443	21.7421	21.3334	38.7655	38.6633	38.2546
UBE2E1	chr3:23845514-23933131	27.0054	26.7758	25.8575	60.6524	60.4228	59.5045
UBE2V2	chr8:48920994-48974454	3.76742	3.87742	4.31741	12.3788	12.4888	12.9288
UBE3A	chr15:25582395-25684175	21.7334	21.5425	20.7789	41.57	41.3791	40.6155
